# Supplementary material for: Fe(iii)-incorporated porphyrin-based conjugated organic polymer as a peroxidase mimic for the sensitive determination of glucose and H2O2
Source: Royal Society of Chemistry journal article supplement (doi:10.1039/d3tb00977g), 2023-01-01
Supplement: d3tb00977g1.pdf [file d3tb00977g1.pdf]

## **Electronic Supplementary Information**

### **Fe(III) incorporated porphyrin-based conjugated organic polymer as peroxidase-mimic for sensitive determination of glucose and H<sub>2</sub>O<sub>2</sub>**

Samanka Narayan Bhaduri, Debojit Ghosh, Sauvik Chatterjee, Rima Biswas, Asim Bhaumik,\* Papu Biswas\*

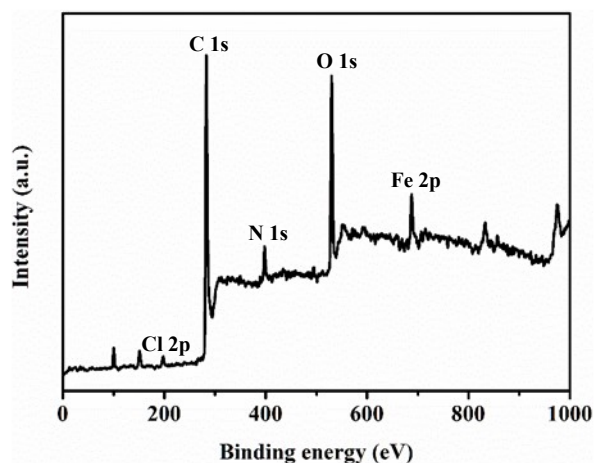

**Fig. S1** Survey spectra of Fe-DMP-POR

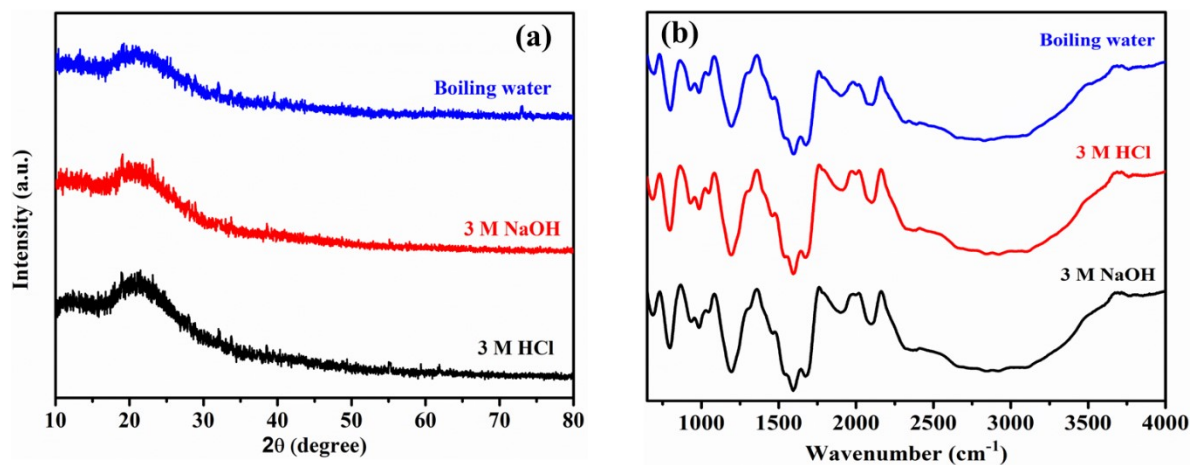

**Fig. S2** (a) XRD and (b) FT-IR of Fe-DMP-POR after treatment with 3 M NaOH, 3 M HCl and boiling water

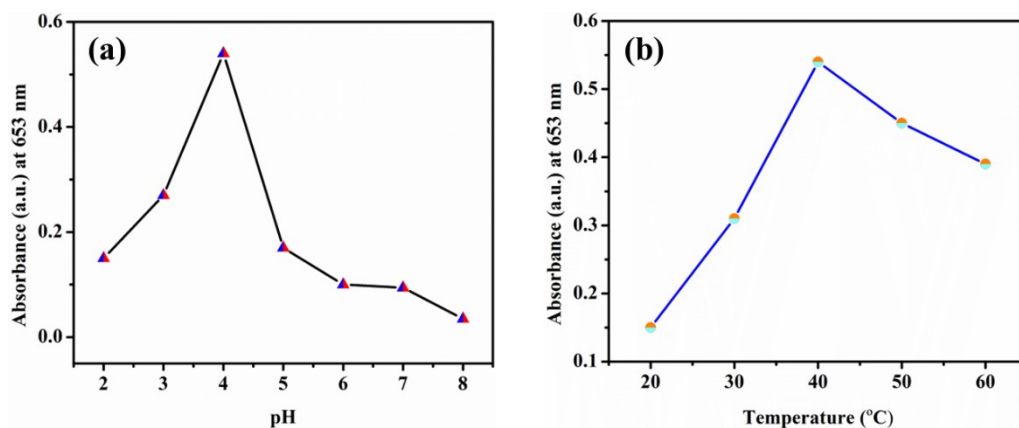

**Fig. S3** (a) Optimisation of pH and (b) optimisation of temperature for peroxidase like activity

**Table S1.** Comparison of kinetic parameters like  $K_m$  and  $V_{max}$  with other reported materials

| Catalyst                                               | Substrate                     | $K_m$<br>(mM) | $V_{max}$<br>( $10^{-8} \text{ Ms}^{-1}$ ) | Reference |
|--------------------------------------------------------|-------------------------------|---------------|--------------------------------------------|-----------|
| Fe-DMP-POR                                             | TMB                           | 0.14          | 1.44                                       | This work |
|                                                        | H <sub>2</sub> O <sub>2</sub> | 16.9          | 4.50                                       |           |
| HRP                                                    | TMB                           | 100           | 5.71                                       | 1         |
|                                                        | H <sub>2</sub> O <sub>2</sub> | 142           | 1.33                                       |           |
| Au/OMC                                                 | TMB                           | 0.015         | 1.50                                       | 2         |
|                                                        | H <sub>2</sub> O <sub>2</sub> | 38.11         | 4.00                                       |           |
| CePO <sub>4</sub> -CeO <sub>2</sub> composite nanorods | TMB                           | 0.236         | 8.78                                       | 3         |
|                                                        | H <sub>2</sub> O <sub>2</sub> | 4.76          | 29.79                                      |           |
| Bi <sub>2</sub> Te <sub>3</sub> -Au <sub>5</sub>       | TMB                           | 0.261         | 2.15                                       | 4         |
|                                                        | H <sub>2</sub> O <sub>2</sub> | 11.36         | 4.48                                       |           |

**Table S2.** Comparisons of different glucose sensing parameters

| Catalyst                                           | Linear range (mM) | LOD ( $\mu\text{M}$ ) | Reference |
|----------------------------------------------------|-------------------|-----------------------|-----------|
| Fe-DMP-POR                                         | 0-0.150           | 4.84                  | This work |
| PVP-MoS <sub>2</sub> nanoparticles                 | 1-10              | 320                   | 5         |
| NiCo <sub>2</sub> S <sub>4</sub> Microflowers      | 0.02-1            | 6.24                  | 6         |
| MoS <sub>2</sub> nanoflakes                        | 0.1-1             | 33.51                 | 7.        |
| Bi <sub>2</sub> Te <sub>3</sub> -Au <sub>0.5</sub> | 0-4.5             | 380                   | 4         |
| CePO <sub>4</sub> -CeO <sub>2</sub>                | 0-0.1             | 4.1                   | 3         |
| Core-shell Cu/Au NPs                               | 0.02-0.670        | 15                    | 8         |
| Fe <sub>3</sub> O <sub>4</sub> @Au-Pt              | 0.00005-0.140     | 0.025                 | 9         |

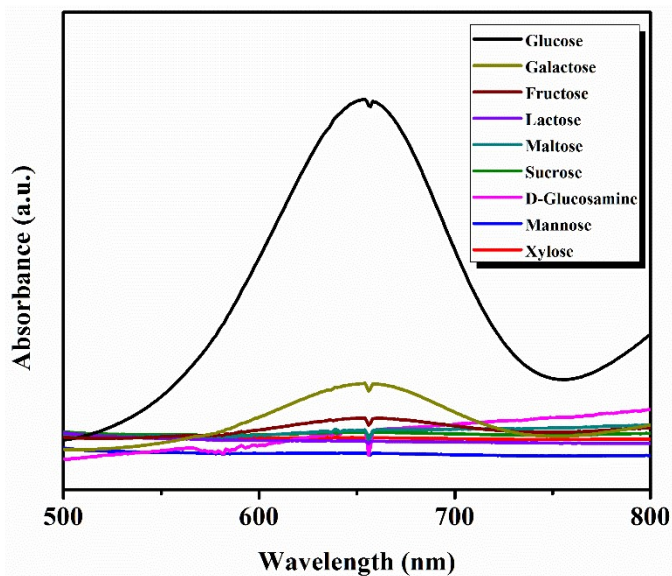

**Fig. S4** UV spectra of solutions containing different monosaccharides and glucose

**Table S3.** Detection of glucose in blood serum samples

| Sample No. | Spiked glucose/mM | Recovered glucose/mM | RSD/% | Recovery/% |
|------------|-------------------|----------------------|-------|------------|
| 1          | 0.05              | 0.051                | 3.1   | 102        |
| 2          | 0.075             | 0.074                | 2.5   | 98         |
| 3          | 0.1               | 0.103                | 2.8   | 103        |
| 4          | 0.15              | 0.16                 | 3     | 106        |

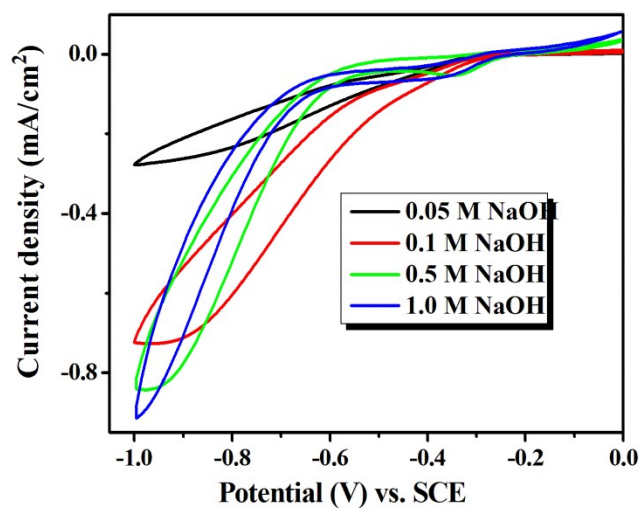

**Fig. S5** Optimisation of NaOH concentration for H<sub>2</sub>O<sub>2</sub> detection

**Table S4.** Comparison of different parameters for amperometric peroxide detection with other materials.

| Modified electrodes                      | Linear range (mM) | Sensitivity ( $\mu\text{A cm}^{-2} \text{mM}^{-1}$ ) | Limit of detection ( $\mu\text{M}$ ) | Reference |
|------------------------------------------|-------------------|------------------------------------------------------|--------------------------------------|-----------|
| Pd-TiO <sub>2</sub>                      | 1-20              | 550                                                  | 23                                   | 10        |
| Ag <sub>dahlia</sub>                     | upto 15 mM        | 330                                                  | 2.2                                  | 11        |
| CuS/RGO                                  | 0.001-1           | 7.96                                                 | 0.3                                  | 12        |
| $\alpha$ -Fe <sub>2</sub> O <sub>3</sub> | 0.050-1.340       | 24                                                   | 5                                    | 13        |
| Ag-MnO <sub>2</sub> -MWCNTs/CGE          | upto 10.4 mM      | 82.5                                                 | 1.7                                  | 14        |
| RGO/Fe <sub>3</sub> O <sub>4</sub>       | upto 6 mM         | 688                                                  | 3.2                                  | 15        |
| Fe-DMP-POR                               | 0.005-2           | 947.67                                               | 3.16                                 | This work |

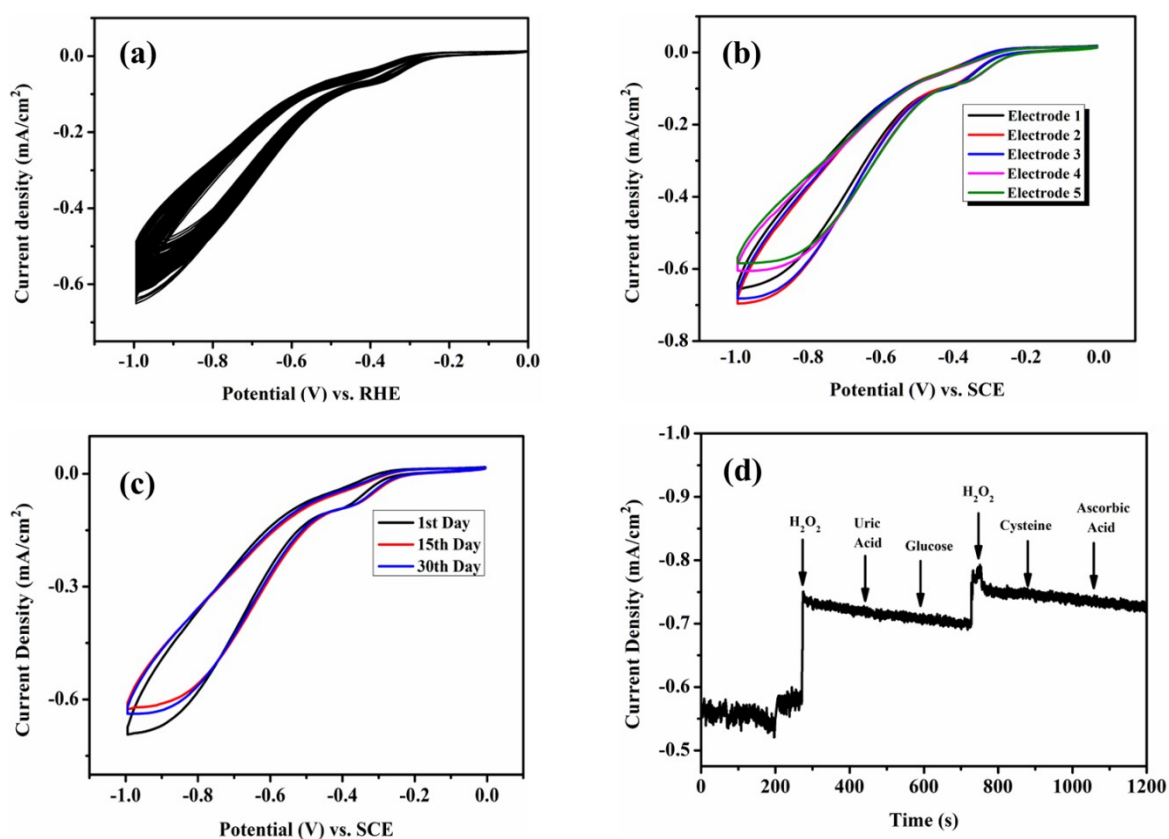

**Fig. S6** (a) Repeatability study, (b) Fabrication reproducibility (five electrode), (c) long term stability study of Fe-DMP-POR in 0.1 M NaOH and H<sub>2</sub>O<sub>2</sub> and (d) selectivity study of Fe-DMP-POR for uric acid glucose, cysteine and ascorbic acid at -0.78 V in 0.1 M NaOH

## REFERENCES

- 1 P. Nagvenkar and A. Gedanken, *ACS Appl. Mater. Interfaces*, 2016, **8**, 22301–22308.
- 2 R. Banerjee, D. Ghosh, J. Satra, A. B. Ghosh, D. Singha, M. Nandi and P. Biswas, *ACS Omega*, 2019, **4**, 16360–16371.
- 3 G. Vinothkumar, A. I. Lalitha and K. Suresh Babu, *Inorg. Chem.*, 2018, **58**, 349–358.
- 4 S. S. Kulkarni, C. T. Wu, V. Sridhar, V. K. Ponnusamy and S. Chattopadhyay, *ACS Appl. Nano Mater.*, 2022, **5**, 15563–15573.
- 5 J. Yu, X. Ma, W. Yin and Z. Gu, *RSC Adv.*, 2016, **6**, 81174–81183.
- 6 Z. Huang, W. He, H. Shen, G. Han, H. Wang, P. Su, J. Song and Y. Yang, *Talanta*, 2021, **230**, 122337.
- 7 J. Yu, D. Ma, L. Mei, Q. Gao, W. Yin, X. Zhang, L. Yan, Z. Gu, X. Ma and Y. Zhao, *J. Mater. Chem. B*, 2018, **6**, 487–498.
- 8 R. Sun, R. Lv, Y. Zhang, T. Du, Y. Li, L. Chen and Y. Qi, *RSC Adv.*, 2022, **12**, 21875–21884.
- 9 X. Feng, H. Fu, Z. Bai, P. Li, X. Song and X. Hu, *New J. Chem.*, 2022, **46**, 239–249.
- 10 Q. Yi, F. Niu and W. Yu, *Thin Solid Films*, 2011, **519**, 3155–3161.
- 11 R. M. Sarhan, G. A. El-Nagar, A. Abouserie and C. Roth, *ACS Sustain. Chem. Eng.*, 2019, **7**, 4335–4342.
- 12 Y. J. Yang, W. Li and X. Wu, *Electrochim. Acta*, 2014, **123**, 260–267.
- 13 S. Majumder, B. Saha, S. Dey, R. Mondal, S. Kumar and S. Banerjee, *RSC Adv.*, 2016, **6**, 59907–59918.
- 14 Y. Han, J. Zheng and S. Dong, *Electrochim. Acta*, 2013, **90**, 35–43.
- 15 Y. Ye, T. Kong, X. Yu, Y. Wu, K. Zhang and X. Wang, *Talanta*, 2012, **89**, 417–421.
